# Supplementary material
Source: ML conference proceedings conference paper supplement (https://proceedings.neurips.cc/paper_files/paper/2012/hash/eeb69a3cb92300456b6a5f4162093851-Abstract.html)
Supplement: Supplementary file 1 [file eeb69a3cb92300456b6a5f4162093851-Supplemental.zip]

Archive with 1 entries (1 files):
- nips965supplementary.pdf
